# Supplementary material
Source: PubMed Central journal article supplement (PMC4468527)
Supplement: IAI.00097-15_zii999091275so1.pdf [file IAI.00097-15_zii999091275so1.pdf]

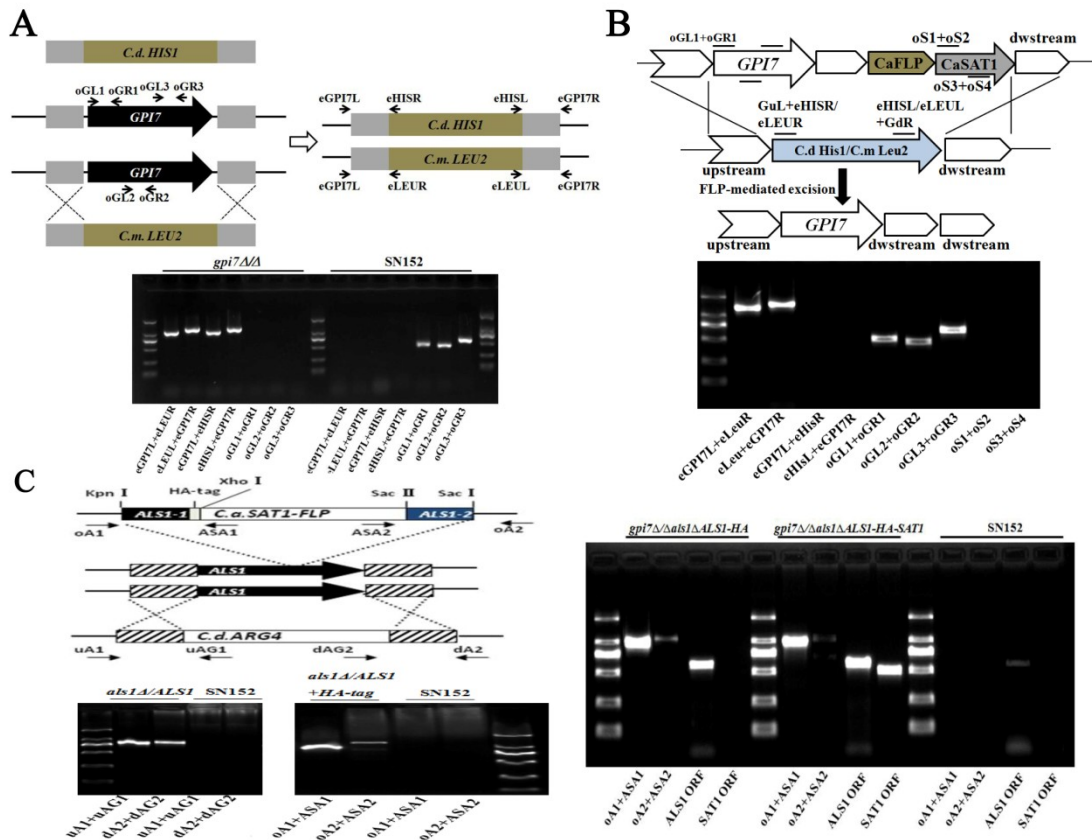

**FIG. S1. Construction of strains.** (A) Strategy for deletion of *C.albicans* *GPI7* based on two-step homologous recombination using a fusion-PCR-based strategy (1,2). (B) Strategy for construction of the *C.albicans* *GPI7* reconstituted strain based on SAT1 flipping method (3). (C) Strategy for construction of strains expressing HA-tag fused *Als1p* (*gpi7Δ/Δ als1Δ/ALS1-HA* and *als1Δ/ALS1-HA*) in strain *gpi7Δ/Δ* and SN152.

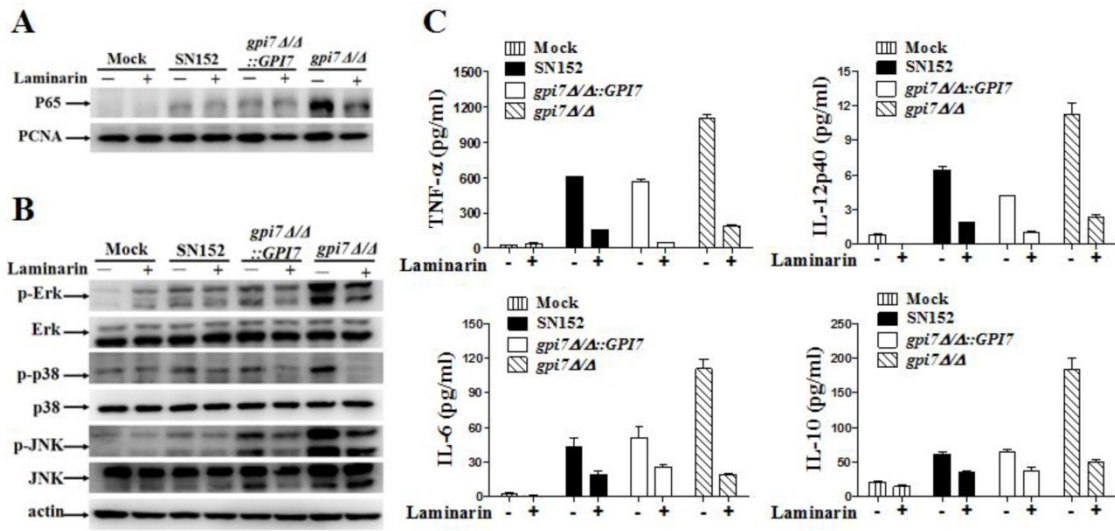

**FIG. S2. NF-κB and MAPK activation and inflammatory responses stimulated by *C.albicans* yeast *gpi7Δ/Δ*, which was abolished GPI-CWPs, were dectin-1 dependent.**

Thioglycollate-elicited peritoneal macrophages from wild type mice with or without 500 μg/ml laminarin preincubation were stimulated with *C.albicans* yeasts (MOI=5) of SN152, *gpi7Δ/Δ::GPI7* or *gpi7Δ/Δ* for 1 hour (A) or 30 minutes (B). The nuclear extracts (A) and cell lysates (B) were analyzed by immunoblotting with the indicated antibodies. (C) ELISA assays for TNF-α, IL-6, IL-12p40 and IL-10 in supernatants of thioglycollate-elicited peritoneal macrophages from wild type mice in the presence or absence of 500 μg/ml laminarin, which were stimulated with the indicated *C. albicans* yeasts (MOI =5) for 6 hours. Data shown are representative of three independent experiments. Data are means± SD.

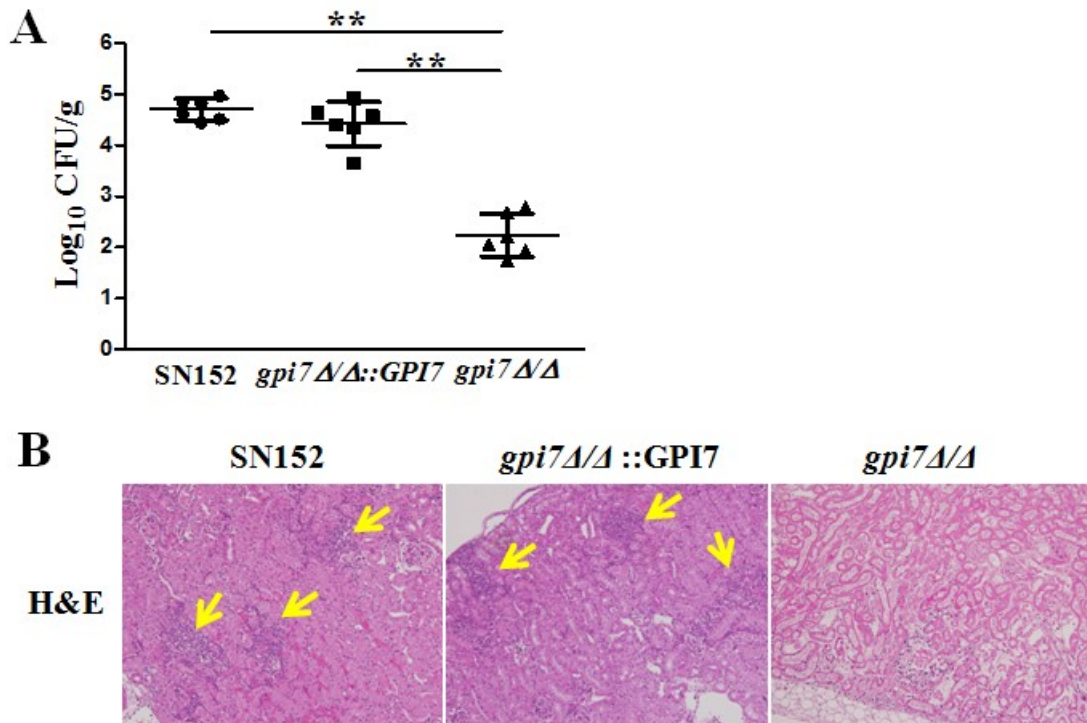

**FIG. S3. *GPI7* gene is required for normal virulence during hematogenously disseminated candidiasis.** Mice were inoculated via the tail vein with  $2 \times 10^5$  CFU yeast-phase cells of the indicated strains of *C. albicans*. (A) Kidney fungal burdens of mice after infection with the parent, revertant and *gpi7Δ/Δ* mutant strains for 7 days, respectively. Data are representative of three independent experiments. \*\*,  $P < 0.01$  (Kruskal-Wallis nonparametric One-way ANOVA with Dunns post-test). (B) Hematoxylin and eosin (H&E) staining with thin sections of kidneys after infection with the parent, revertant and *gpi7Δ/Δ* mutant strains for 7 days, respectively.

**TABLE S1. *C. albicans* strains used in this study**

| Strain                                         | Relevant genotype                                                                                                                                                                                                                                                                           | Source or reference |
|------------------------------------------------|---------------------------------------------------------------------------------------------------------------------------------------------------------------------------------------------------------------------------------------------------------------------------------------------|---------------------|
| SC5314                                         | Wild type                                                                                                                                                                                                                                                                                   | Dominique Sanglard  |
| SN152                                          | <i>arg4</i> $\Delta$ / <i>arg4</i> $\Delta$ <i>leu2</i> $\Delta$ / <i>leu2</i> $\Delta$ <i>his1</i> $\Delta$ / <i>his1</i> $\Delta$<br><i>URA3/ura3</i> $\Delta$ :: <i>imm</i> <sup>434</sup> <i>IRO1/iro1</i> $\Delta$ :: <i>imm</i> <sup>434</sup>                                        | Noble               |
| <i>gpi7</i> $\Delta$ / $\Delta$                | <i>gpi7</i> $\Delta$ :: <i>HIS1</i> / <i>gpi7</i> $\Delta$ :: <i>LEU2</i> <i>arg4</i> $\Delta$ / <i>arg4</i> $\Delta$<br><i>URA3/ura3</i> $\Delta$ :: <i>imm</i> <sup>434</sup> <i>IRO1/iro1</i> $\Delta$ :: <i>imm</i> <sup>434</sup>                                                      | This study          |
| <i>gpi7</i> $\Delta$ / $\Delta$ :: <i>GPI7</i> | <i>gpi7</i> $\Delta$ :: <i>HIS1</i> / <i>gpi7</i> $\Delta$ :: <i>GPI7</i> :: <i>SAT1-FLIP</i><br><i>arg4</i> $\Delta$ / <i>arg4</i> $\Delta$ <i>URA3/ura3</i> $\Delta$ :: <i>imm</i> <sup>434</sup> <i>IRO1/iro1</i> $\Delta$ :: <i>imm</i> <sup>434</sup>                                  | This study          |
| <i>gpi7</i> $\Delta$ / $\Delta$                | <i>gpi7</i> $\Delta$ :: <i>HIS1</i> / <i>gpi7</i> $\Delta$ :: <i>LEU2</i> <i>ALS1</i> :: <i>HA</i> :: <i>SAT1-FLIP</i> /                                                                                                                                                                    | This study          |
| <i>als1</i> $\Delta$ / <i>ALS1-HA</i>          | <i>als1</i> $\Delta$ :: <i>ARG4</i> <i>URA3/ura3</i> $\Delta$ :: <i>imm</i> <sup>434</sup> <i>IRO1/iro1</i> $\Delta$ :: <i>imm</i> <sup>434</sup>                                                                                                                                           |                     |
| <i>als1</i> $\Delta$ / <i>ALS1-HA</i>          | <i>ALS1</i> :: <i>HA</i> :: <i>SAT1-FLIP</i> / <i>als1</i> $\Delta$ :: <i>ARG4</i> <i>leu2</i> $\Delta$ / <i>leu2</i> $\Delta$<br><i>his1</i> $\Delta$ / <i>his1</i> $\Delta$ <i>URA3/ura3</i> $\Delta$ :: <i>imm</i> <sup>434</sup> <i>IRO1/iro1</i> $\Delta$ :: <i>imm</i> <sup>434</sup> | This study          |

**TABLE S2. Primers used in this study**

| Primer  | Sequence                                    |
|---------|---------------------------------------------|
| eGPI7L  | TCTATGTGGGGGAGGTCAAA                        |
| GuR     | cacggcgcgcctagcagcggTGTGTGGATGGGTCTGAAAA    |
| GdL     | gtcagcggcccatccctgcGGATCTCTGAAATGAGGTTGG    |
| eGPI7R  | TGGATGGTGATGGTGAAGAA                        |
| oGL1    | TCACCACAGGAGGTACACCA                        |
| oGR1    | TCATCCCATGATCTCCCATT                        |
| oGL2    | TCTAGCCGTGATTGTGGTGT                        |
| oGR2    | TGCAAATGTTGGCACTAAGC                        |
| oGL3    | CCTGGTGGGTTGATTCATT                         |
| oGR3    | ACCCACCAAAAACACATTG                         |
| GuL     | GGCATCAATTATTGGGCAT                         |
| GdR     | CTGCTGAAGCTGCAAGAGAA                        |
| eHISR   | TCAAGCCCTGTAGCTCCATT                        |
| eHISL   | TCCGCTCATTGATTCCTC                          |
| eLEUR   | GCACGCCGTTACAGGAGTTA                        |
| eLEUL   | GAAGTTGGTGACGCGATTGT                        |
| Primer2 | ccgctgctaggcgcgccgtgACCAGTGTGTGATGGATATCTGC |
| Primer5 | ccagggatgcggccgctgacAGCTCGGATCCACTAGTAACG   |

|             |                                 |
|-------------|---------------------------------|
| GPI7rup L   | ATAAGGGCCC CCATAATCCTCTCCCCTGGT |
| GPI7rup R   | CCGCTCGAGTGTGTGGATGGGTCTGAAAA   |
| GPI7rdown L | CCCACCGCGGCACACTACAAACCCCAACATC |
| GPI7rdown R | CCATAGAGCTCTGGATGGTGATGGTGAAGAA |
| oS1         | GGAGTCACCGAACAACACAA            |
| oS2         | TGTGGCTCTCTTGATTGCTG            |
| oS3         | GACGCTCAGTGCACACAACCT           |
| oS4         | TCGCAAATTCGATGAGACTG            |
| uA1         | TTGCAAAAATTTCCAACCTGGT          |
| dA2         | CAACTTGCTTTGCTCTGCAC            |
| oA1         | ATTTGCCACAACCACCACAG            |
| oA2         | TCATTTGAAGCACTGGCAAC            |
| uAG1        | CTCAATAAAACAATCCTGGGT           |
| dAG2        | TTCAAAATAGGTATCACGGGC           |
| ASA1        | GCACGCTAGACAAATTCTTCC           |
| ASA2        | CAGCTCCTTGGCATAACGATT           |

---

## SUPPLEMENTAL REFERENCES

1. **Yan L, Côte P, Li XX, Jiang YY, Whiteway M.** 2012. Pall domain proteins of *Saccharomyces cerevisiae* and *Candida albicans*. *Microbiol Res.* 167: 422-432.
2. **Noble SM, Johnson AD.** 2005. Strains and strategies for large-scale gene deletion studies of the diploid human fungal pathogen *Candida albicans*. *Eukaryot Cell.* 4: 298–309.
3. **Reuss O, Vik A, Kolter R, Morschhäuser J.** 2004. The SAT1 flipper, an optimized tool for gene disruption in *Candida albicans*. *Gene.* 341: 119-127.
